# Supplementary material
Source: publisher site journal article supplement (https://www.spandidos-publications.com/1555/downloadSupplementary)
Supplement: Supplementary file 1 [file downloadSupplementary]

## Sheet: sigdiff
Table SI. Differentially expressed genes between normal bone tissues and osteosarcoma tissues.
Gene	logFC	logCPM	P-value	FDR
GABRP	-7.8759	2.57474	3.75296e-45	7.53482e-41
MUC16	-8.67793	2.90474	6.57089e-39	6.59619e-35
ERN2	-7.41679	1.01022	1.81003e-37	1.21133e-33
LIN28A	-7.65502	-0.186578	1.73253e-35	8.696e-32
TSPAN1	-6.50904	4.19745	2.05287e-30	7.95013e-27
MSMB	-11.0215	3.54466	2.51752e-30	7.95013e-27
SERPINB11	-10.36	-0.0725125	2.77187e-30	7.95013e-27
GPX2	-5.75861	0.028603	1.21731e-29	3.05498e-26
CCDC17	-4.90442	2.76674	9.73006e-29	2.17056e-25
LCN2	-8.67499	3.60641	1.77782e-28	3.56934e-25
RHOV	-5.69423	0.298526	2.11704e-28	3.86398e-25
PRF1	-5.98557	4.57386	3.75311e-28	6.27926e-25
KRT23	-7.28188	0.32406	1.29732e-27	2.00357e-24
AQPEP	-5.95362	2.31982	4.64121e-27	6.65582e-24
KRT5	-7.95024	4.17538	5.83451e-27	7.80929e-24
MUC4	-6.95694	2.81927	8.221e-27	1.00454e-23
RSPH1	-6.65631	2.01458	8.50582e-27	1.00454e-23
CLCA2	-6.07804	1.29332	1.58872e-26	1.68729e-23
TMPRSS4	-9.20035	1.70286	1.59678e-26	1.68729e-23
CLCA4	-8.18257	0.38451	3.43181e-26	3.44502e-23
FAM3D	-6.25424	0.89826	1.02082e-25	9.75954e-23
MMP10	-7.39667	2.39173	1.68933e-25	1.54166e-22
TFF3	-7.34941	3.77447	1.79894e-25	1.57032e-22
KRT6A	-9.05131	2.1899	2.29708e-25	1.92161e-22
ECT2L	-4.94207	0.883951	4.07945e-25	3.27612e-22
CYP2A13	-7.48853	-0.324357	4.46285e-25	3.44618e-22
ABCA13	-5.72864	3.33958	4.50667e-24	3.35113e-21
LRRC46	-4.87523	1.76456	7.02142e-24	5.03461e-21
TMPRSS11D	-7.30309	-0.0270441	9.5478e-24	6.61004e-21
WDR96	-5.43104	2.06952	1.41395e-23	9.46264e-21
GJB5	-5.49086	-1.18056	7.77253e-23	5.03384e-20
GZMB	-6.14738	3.93075	1.88546e-22	1.18295e-19
LOC100130093	-4.20751	1.11721	1.99793e-22	1.21553e-19
FUT6	-6.06061	-1.30792	1.26401e-21	7.46398e-19
DHRS9	-5.43242	2.52046	2.10472e-21	1.20733e-18
PLEKHG7	-6.93144	0.420489	3.02298e-21	1.6859e-18
ALOX15	-7.53201	2.65903	3.49535e-21	1.86745e-18
FMO6P	-7.5227	-0.968356	3.53455e-21	1.86745e-18
GJB4	-6.6063	-1.67226	3.62958e-21	1.86849e-18
TNS4	-6.37228	0.262243	2.96619e-20	1.4888e-17
SERPINB13	-8.30539	-0.200751	4.29571e-20	2.10354e-17
MUC5B	-8.94479	5.2927	4.96416e-20	2.37299e-17
ALDH3A1	-7.10599	2.60232	5.08493e-20	2.37419e-17
ROPN1L	-5.66113	0.40362	6.02842e-20	2.75074e-17
CDHR4	-5.70522	1.39021	7.06057e-20	3.15011e-17
CCDC37	-6.10364	0.830864	9.0462e-20	3.94827e-17
ADH7	-9.37262	0.592723	1.05737e-19	4.51676e-17
CCDC42B	-5.47962	0.581989	1.27552e-19	5.33514e-17
CTSW	-4.85737	3.404	2.024e-19	8.29303e-17
DEFB132	-7.89457	-2.36564	3.07822e-19	1.23603e-16
ZMYND10	-4.3712	2.17195	3.5073e-19	1.38071e-16
KRT12	-5.60013	0.113378	4.84102e-19	1.8691e-16
FUT2	-3.91946	0.304248	6.0383e-19	2.28738e-16
KRT15	-8.52812	2.9913	7.73296e-19	2.87509e-16
GLYAT	-7.77603	-0.0799294	1.01349e-18	3.69962e-16
CNGA4	-4.85843	-0.845291	1.26422e-18	4.53244e-16
DNAH12	-5.30495	1.39087	1.30722e-18	4.60438e-16
C11orf16	-5.50702	-0.144255	1.36782e-18	4.73478e-16
PADI1	-6.05959	-0.792807	2.25993e-18	7.68897e-16
RSPH4A	-4.62985	1.22286	2.29785e-18	7.68897e-16
CAPN13	-7.60164	3.52617	4.05526e-18	1.33471e-15
SCGB2A1	-8.71136	-0.178372	4.18763e-18	1.35605e-15
C9orf24	-5.21185	1.27392	4.58912e-18	1.43077e-15
DNAH3	-4.91248	1.52175	4.60895e-18	1.43077e-15
LEP	-7.06955	2.00656	4.63216e-18	1.43077e-15
LYPD2	-7.99798	-0.57345	4.93823e-18	1.50219e-15
CHP2	-6.24954	0.549533	6.8452e-18	2.05121e-15
KRT13	-9.43826	1.82187	7.45878e-18	2.2022e-15
KLB	-5.72207	1.35837	8.45043e-18	2.45883e-15
VNN3	-6.26412	-0.239332	9.83257e-18	2.82012e-15
CCDC135	-5.56324	-0.471264	1.1624e-17	3.28698e-15
PRSS58	-8.02458	-2.60607	1.25782e-17	3.5074e-15
C1orf194	-6.03897	0.524502	1.44831e-17	3.98325e-15
SLC26A4	-4.53103	0.686523	1.57882e-17	4.28351e-15
CCDC114	-4.96557	1.51124	1.69424e-17	4.53537e-15
FAM92B	-6.14917	0.859725	1.74154e-17	4.60064e-15
NNAT	-4.57399	2.29895	1.79338e-17	4.61717e-15
UGT2A1	-8.76526	-0.230218	1.79379e-17	4.61717e-15
SPDEF	-5.57084	-0.106134	3.0466e-17	7.73679e-15
TEX26	-6.94184	-0.905349	3.08285e-17	7.73679e-15
PLIN1	-6.42042	5.03587	3.40211e-17	8.43057e-15
MAP3K19	-5.9396	0.0412188	3.44328e-17	8.43057e-15
DNAH5	-5.61864	2.379	4.04156e-17	9.70671e-15
CAPSL	-5.79501	0.485376	4.06118e-17	9.70671e-15
SLC23A1	-4.15113	-0.317593	4.85898e-17	1.13495e-14
PSCA	-4.72109	0.932725	4.86155e-17	1.13495e-14
TMEM213	-8.07891	0.202166	5.26408e-17	1.21479e-14
CDHR3	-4.59218	2.64947	6.06143e-17	1.3829e-14
FANK1	-4.082	1.20911	7.25084e-17	1.63567e-14
ZG16B	-5.33528	-0.231928	8.74274e-17	1.95031e-14
DNAH7	-4.02556	1.25329	9.35693e-17	2.06438e-14
FER1L6	-4.44911	0.244322	9.63704e-17	2.10307e-14
CYP2F1	-6.82961	0.766374	1.00008e-16	2.15898e-14
C1orf189	-5.41051	-1.04289	1.25987e-16	2.67912e-14
TMEM232	-4.58544	0.0948759	1.27887e-16	2.67912e-14
RNF183	-5.12479	-2.06237	1.28105e-16	2.67912e-14
C9orf116	-3.40262	1.18174	1.33913e-16	2.77173e-14
AQP3	-4.94281	5.10429	1.48379e-16	3.0398e-14
MIR205HG	-8.67734	-0.0308482	2.07576e-16	4.20961e-14
DNAAF1	-5.99382	1.09782	2.21603e-16	4.44913e-14
SPEF1	-4.62641	0.166311	2.2425e-16	4.4577e-14
DGAT2	-4.73075	3.96584	2.38545e-16	4.69537e-14
DLEC1	-4.74068	2.27041	2.6964e-16	5.25588e-14
AKAP14	-5.27592	-0.887175	2.89025e-16	5.56281e-14
SOX21	-5.91235	-0.0140549	2.90927e-16	5.56281e-14
CASC1	-4.25563	0.0711764	3.31476e-16	6.27835e-14
WDR38	-6.20431	0.404998	3.66368e-16	6.87437e-14
DYNLRB2	-4.77064	-0.290494	4.637e-16	8.6201e-14
UCN3	-7.52941	-1.42067	6.11236e-16	1.12585e-13
FAM81B	-6.41567	0.296024	7.09593e-16	1.29514e-13
EPN3	-4.28405	0.509685	7.8997e-16	1.42885e-13
ST6GALNAC1	-5.5113	1.60175	8.19675e-16	1.46934e-13
PROM2	-4.11105	1.79412	9.91184e-16	1.76106e-13
SPRR1B	-7.57726	-3.25742	1.01413e-15	1.78603e-13
MORN5	-6.08979	-0.268883	1.13849e-15	1.98413e-13
ADAM28	-3.95423	3.62239	1.14638e-15	1.98413e-13
ASCL3	-5.37716	-2.5211	1.18543e-15	2.03419e-13
AREG	-6.31482	1.368	1.34614e-15	2.29037e-13
SERPINB3	-8.68537	4.64695	1.51789e-15	2.5609e-13
CCDC11	-3.7902	0.748819	1.63329e-15	2.73262e-13
ENPP3	-4.3641	0.381412	2.07376e-15	3.4409e-13
C9orf117	-3.76916	2.01143	2.60127e-15	4.2808e-13
AK7	-4.96364	0.666486	2.64016e-15	4.30948e-13
WDR65	-5.29542	0.475768	2.67132e-15	4.32517e-13
LRRC10B	-3.87299	1.66698	3.2128e-15	5.16028e-13
DNAI2	-5.14605	0.419847	3.37076e-15	5.33217e-13
ADH1C	-6.02754	2.35211	3.37295e-15	5.33217e-13
WDR16	-5.85421	0.496035	3.55503e-15	5.57612e-13
EFCAB12	-4.07098	-0.239212	4.24776e-15	6.61102e-13
CCDC60	-6.55616	-0.766429	4.51882e-15	6.97879e-13
PLEKHS1	-5.19779	2.08284	4.66556e-15	7.15042e-13
ATP6V0A4	-5.38411	-0.281587	4.93873e-15	7.51173e-13
C11orf88	-5.58657	0.660717	6.49224e-15	9.80036e-13
BPIFA1	-11.7841	8.05348	8.45816e-15	1.26727e-12
NOS2	-4.3732	2.63383	8.77396e-15	1.30485e-12
AGBL2	-3.97227	1.30915	1.06527e-14	1.5726e-12
BPIFB1	-9.2011	6.35929	1.13441e-14	1.66245e-12
TRIM29	-5.36838	2.43243	1.37428e-14	1.99938e-12
SVOPL	-5.01711	-1.51877	1.43747e-14	2.07627e-12
LIPE	-4.29271	3.97277	1.46959e-14	2.1008e-12
DYDC2	-6.20414	0.197233	1.47538e-14	2.1008e-12
KCNIP2	-4.01503	2.04303	1.54687e-14	2.17896e-12
CCDC173	-4.37831	0.0119169	1.55198e-14	2.17896e-12
TEKT2	-4.60626	0.857246	1.60982e-14	2.24446e-12
CCDC19	-3.87413	1.58922	1.93784e-14	2.68317e-12
DNAI1	-4.76756	1.18217	2.01073e-14	2.76503e-12
C22orf15	-4.76622	-0.831015	2.24286e-14	3.06327e-12
LOC100130899	-4.78453	-0.487472	2.60256e-14	3.53051e-12
WFDC2	-5.66691	4.34588	3.0589e-14	4.12171e-12
TTLL10	-5.57628	0.208649	3.64214e-14	4.87488e-12
MEPE	-6.54744	7.16625	3.86883e-14	5.14401e-12
A2ML1	-4.58108	-1.41658	4.76673e-14	6.29616e-12
CP	-5.45848	3.50006	5.73071e-14	7.51996e-12
RASSF5	-3.21537	4.52496	5.79026e-14	7.54877e-12
AQP5	-5.50978	2.03368	6.141e-14	7.95438e-12
CALML3	-7.99001	-0.475935	7.79157e-14	1.00276e-11
C5orf49	-5.16142	1.24831	8.60475e-14	1.09754e-11
LRRC71	-4.12472	0.368531	8.6373e-14	1.09754e-11
C6orf118	-5.61933	-0.12003	9.54688e-14	1.20549e-11
CCDC170	-3.45197	2.47865	1.16151e-13	1.45747e-11
SLC44A4	-5.79147	2.99283	1.24023e-13	1.54659e-11
LGALS12	-5.13736	1.82902	1.6724e-13	2.07264e-11
CIDEC	-7.3453	3.76511	1.74627e-13	2.15091e-11
TMEM190	-6.04511	0.883952	1.8259e-13	2.23528e-11
C2orf73	-4.22279	-1.79333	1.91682e-13	2.33237e-11
TCN1	-6.32375	-1.31505	2.00726e-13	2.4277e-11
PIFO	-4.61455	2.19425	2.28454e-13	2.74651e-11
KRT40	-5.52295	-2.52	2.40923e-13	2.87917e-11
UBXN10	-4.54751	1.50844	2.95978e-13	3.51619e-11
ANGPTL5	-4.87182	0.751899	3.06234e-13	3.61663e-11
C15orf26	-4.12813	-0.830916	4.02885e-13	4.73025e-11
MS4A6E	-4.82373	-2.7202	4.08105e-13	4.76367e-11
VTCN1	-4.93269	0.349843	4.33694e-13	5.03311e-11
VMO1	-3.62567	2.65006	4.55158e-13	5.25184e-11
HEPACAM2	-4.73261	-1.93424	4.9248e-13	5.65001e-11
ENKUR	-4.0181	1.07065	5.20344e-13	5.93577e-11
DNAAF3	-4.48502	0.951631	6.99616e-13	7.9357e-11
C17orf72	-3.39957	2.09465	8.19389e-13	9.24207e-11
ALDH3B2	-6.05646	-0.962997	9.2641e-13	1.03908e-10
CCL17	-4.92669	0.267044	1.1361e-12	1.26719e-10
CCDC33	-6.18012	-0.764423	1.17979e-12	1.30865e-10
LOC643037	-6.68817	-1.48173	1.23505e-12	1.36242e-10
CIDEA	-5.7411	1.16467	1.45919e-12	1.60088e-10
CCL13	-4.654	2.63163	1.47511e-12	1.60956e-10
CSTA	-3.57053	2.45156	1.50446e-12	1.6327e-10
KCNRG	-3.65847	-0.408581	1.69501e-12	1.8296e-10
ARMC3	-5.8477	0.658372	2.2846e-12	2.45154e-10
VWA3A	-5.27093	1.40053	2.29561e-12	2.45154e-10
LOC402160	-4.21436	-0.672652	2.38359e-12	2.53203e-10
BCL2L15	-3.20469	0.00523503	2.6279e-12	2.77686e-10
TSPAN19	-5.89129	-0.0467025	2.70197e-12	2.84019e-10
MIR34C	-6.59347	-3.10301	4.35725e-12	4.55627e-10
GABRR1	-5.33016	1.79029	7.45015e-12	7.75008e-10
GJB3	-4.78595	-0.790655	9.41106e-12	9.69623e-10
CYP2S1	-3.5514	2.04133	9.41757e-12	9.69623e-10
KIAA1324	-3.96307	2.32351	9.61474e-12	9.84873e-10
ATP10B	-5.34307	-0.837371	9.7902e-12	9.97756e-10
DEFB1	-5.65456	-0.63346	1.07469e-11	1.08973e-09
PIH1D3	-6.30428	-1.30276	1.27757e-11	1.28894e-09
SPRR3	-6.79955	-3.15141	1.29201e-11	1.29699e-09
C6orf165	-3.55857	0.21127	1.53597e-11	1.53421e-09
SLC28A3	-4.2985	-0.580296	1.82251e-11	1.81141e-09
HRASLS5	-4.63236	2.32151	1.85846e-11	1.83805e-09
CAPS	-3.36372	4.9544	1.93623e-11	1.90557e-09
FCN1	-4.34205	2.94552	1.97277e-11	1.93206e-09
STOML3	-7.17976	0.326201	2.02756e-11	1.96717e-09
NTS	-4.83424	0.324461	2.03306e-11	1.96717e-09
DNAJB13	-4.60895	-0.244399	2.03801e-11	1.96717e-09
TUBA4B	-6.21574	0.161206	2.36781e-11	2.27457e-09
ABCB11	-5.77283	-2.57198	3.09611e-11	2.96002e-09
PIP	-5.76589	-2.39442	3.15598e-11	3.00297e-09
APOBEC4	-6.74997	-0.512262	3.83073e-11	3.62781e-09
CEACAM7	-5.93053	-2.83003	4.04365e-11	3.81148e-09
S100B	-4.58629	2.44618	5.0484e-11	4.7363e-09
CCDC108	-5.31276	0.576311	5.20911e-11	4.85971e-09
FABP4	-5.14967	6.25502	5.22836e-11	4.85971e-09
C1orf173	-4.82387	1.72345	5.54449e-11	5.12981e-09
CD164L2	-5.79622	-0.0496867	5.66501e-11	5.21727e-09
IQUB	-3.73034	-0.565153	5.8643e-11	5.37615e-09
GPR87	-5.7151	-1.37486	6.08133e-11	5.54976e-09
MRAP	-4.94423	-1.71322	6.15707e-11	5.59346e-09
EFHB	-3.8186	0.199101	6.41738e-11	5.80368e-09
GDF15	-3.41064	3.88367	6.60627e-11	5.94772e-09
LY6D	-6.12795	-0.657903	7.04659e-11	6.31582e-09
VSTM2L	-4.22533	3.0437	8.40782e-11	7.50239e-09
C2orf50	-4.37384	-1.93647	9.17586e-11	8.15149e-09
AOX1	-4.36473	3.33944	9.50922e-11	8.41042e-09
F2RL2	-4.06333	1.11164	1.07382e-10	9.45574e-09
TIMP1	-3.03058	9.37826	1.10351e-10	9.64808e-09
ABCD2	-3.87718	2.3513	1.10527e-10	9.64808e-09
CCDC164	-4.47904	0.444202	1.12224e-10	9.75376e-09
CATSPERD	-4.34217	-1.28955	1.17091e-10	1.01329e-08
TTC25	-3.01176	1.27541	1.254e-10	1.07621e-08
FAM83A	-4.15381	-1.24023	1.25434e-10	1.07621e-08
FRMPD2	-4.96058	-1.72403	1.27773e-10	1.09162e-08
MUC2	-5.0458	-2.571	1.68532e-10	1.43169e-08
ADGB	-4.58683	-0.0135944	1.69004e-10	1.43169e-08
TCTEX1D4	-3.51173	-0.0909469	1.73766e-10	1.46584e-08
PPP1R42	-3.92316	-1.77432	1.78618e-10	1.50047e-08
KCNE1	-4.18668	0.109419	2.09423e-10	1.74721e-08
KIF19	-4.0791	0.813655	2.09732e-10	1.74721e-08
SPRR2A	-5.85201	-3.45076	2.11836e-10	1.75745e-08
TFF1	-6.47323	-2.3132	2.16403e-10	1.78795e-08
C12orf74	-6.619	-2.41579	2.33538e-10	1.92161e-08
EFCAB1	-4.23756	2.32049	2.46253e-10	2.01797e-08
WDR93	-3.62757	-0.713154	2.53383e-10	2.06795e-08
NME5	-3.87535	0.723512	2.61549e-10	2.12596e-08
PI3	-5.57832	-0.0658709	2.84807e-10	2.30567e-08
SLC26A4-AS1	-4.97839	-1.99659	3.04629e-10	2.45624e-08
RTDR1	-3.87212	-1.64559	3.28114e-10	2.63502e-08
ADIPOQ-AS1	-6.49769	-3.21681	3.35285e-10	2.68188e-08
CALB2	-4.80124	2.47748	3.53925e-10	2.81908e-08
LEMD1	-5.69438	-2.30558	3.55246e-10	2.81908e-08
TTC18	-2.94505	2.23087	3.60226e-10	2.84734e-08
PLEKHG6	-3.97001	0.560231	3.66e-10	2.88164e-08
SNCG	-3.36928	3.02423	3.6885e-10	2.89273e-08
TMEM132C	-5.39338	1.62456	3.86085e-10	3.01612e-08
SNTN	-7.12041	1.83184	4.15091e-10	3.23015e-08
SLC5A8	-6.98505	1.41524	4.5989e-10	3.56494e-08
TTC16	-4.09451	-0.343369	5.34556e-10	4.1278e-08
PPIL6	-3.23365	1.50409	5.38993e-10	4.14612e-08
ITIH5	-3.97833	5.09086	5.65482e-10	4.33328e-08
TMEM45B	-3.62855	0.510567	6.08707e-10	4.64677e-08
LOC400891	-4.68675	0.482548	6.25816e-10	4.75928e-08
WDR63	-3.39567	0.923653	6.44466e-10	4.88262e-08
C2orf62	-3.4109	-0.0954507	7.23354e-10	5.45969e-08
EREG	-4.93947	0.806125	7.91922e-10	5.95484e-08
LOC728084	-4.39202	0.148231	8.41609e-10	6.30485e-08
CYP4F3	-4.71592	-1.94324	1.02357e-09	7.63948e-08
ZBBX	-6.34504	0.80084	1.14078e-09	8.48272e-08
CCDC78	-3.44749	2.723	1.19274e-09	8.83643e-08
CCDC65	-2.87225	1.18291	1.22168e-09	9.01389e-08
C10orf95	-3.62119	-0.450275	1.22568e-09	9.01389e-08
LOC100505989	-6.11527	-0.986312	1.23185e-09	9.0262e-08
CALML5	-5.09779	-3.47684	1.35199e-09	9.87052e-08
POF1B	-4.88181	-0.053602	1.46867e-09	1.06835e-07
C9orf171	-5.02193	-0.639986	1.476e-09	1.06981e-07
CBLC	-4.28715	-1.28175	1.50518e-09	1.08703e-07
DTHD1	-5.33697	-0.0299502	1.63292e-09	1.17506e-07
CCDC96	-2.55649	1.18579	1.64436e-09	1.17906e-07
LOC440335	-4.44764	-0.0968795	1.72489e-09	1.23241e-07
SPRR1A	-6.00399	-3.46185	1.79622e-09	1.27882e-07
FAM154B	-3.66537	1.69638	1.85413e-09	1.31538e-07
HS3ST1	-2.82397	2.4142	2.01627e-09	1.42538e-07
TSGA10	-2.94532	1.67427	2.06158e-09	1.45229e-07
SLC28A2	-3.53993	-1.60586	2.07988e-09	1.46006e-07
PRR15	-4.23195	1.03028	2.25621e-09	1.57833e-07
UGT1A6	-6.29695	-2.65216	2.5493e-09	1.77716e-07
MGST1	-3.42223	5.00429	2.85146e-09	1.98092e-07
AGR2	-6.65357	4.13962	2.91966e-09	2.02131e-07
CD200R1L	-4.7228	-2.93087	2.94224e-09	2.02994e-07
SEMA3G	-3.27874	5.2573	2.95928e-09	2.03471e-07
LDLRAD1	-6.45096	0.939154	3.14556e-09	2.15541e-07
TEKT4	-4.26709	-0.757557	3.32819e-09	2.27279e-07
AADACL3	-5.61611	-3.14391	3.3722e-09	2.29504e-07
CDH26	-3.19449	0.52413	3.42957e-09	2.3262e-07
BCL2L14	-3.51862	-1.45808	3.49067e-09	2.35967e-07
FABP6	-4.58123	-0.35986	3.52863e-09	2.37733e-07
MUC13	-4.28328	-0.646553	3.79988e-09	2.55151e-07
ATP7B	-2.44117	3.42473	3.84333e-09	2.57208e-07
ADH6	-3.0086	-0.17392	4.05479e-09	2.70459e-07
PACRG	-3.88904	-0.133154	4.0899e-09	2.71897e-07
MS4A8B	-5.4349	1.3593	4.17676e-09	2.76755e-07
SLC27A2	-4.27829	1.79079	4.23983e-09	2.8001e-07
TTC29	-5.10461	-0.316057	4.63107e-09	3.04846e-07
FAT2	-3.67698	2.5139	4.78101e-09	3.13687e-07
MAK	-2.57068	0.713714	5.06852e-09	3.31468e-07
TMPRSS11A	-5.14726	-1.35378	5.61577e-09	3.65828e-07
MDH1B	-2.84738	1.14522	5.63036e-09	3.65828e-07
BTG4	-3.96902	-2.4666	6.79786e-09	4.4026e-07
FAM183A	-5.60975	0.4515	7.08135e-09	4.57146e-07
LINC00326	-5.2615	-2.33834	7.16237e-09	4.60894e-07
CXCL1	-3.75428	1.80228	7.45327e-09	4.78081e-07
GCNT3	-3.27298	-1.19882	7.50084e-09	4.796e-07
C20orf85	-6.98141	1.93838	7.82816e-09	4.9894e-07
CLDN1	-3.48444	2.70193	8.07083e-09	5.12779e-07
MIR205	-6.01759	-3.46308	8.3782e-09	5.29238e-07
CRYM	-3.7975	0.916009	8.38261e-09	5.29238e-07
LRRC43	-3.30892	-0.156709	8.54446e-09	5.37765e-07
HSD17B2	-4.22569	-1.04237	8.71392e-09	5.46717e-07
UGT1A8	-5.94164	-3.15785	9.07995e-09	5.67907e-07
GSN	-2.00782	9.69881	9.17626e-09	5.72148e-07
IL19	-4.59132	-2.75575	9.61364e-09	5.97563e-07
PROM1	-4.75127	2.6168	1.02437e-08	6.34763e-07
TMEM212	-5.84479	-1.3982	1.03279e-08	6.38008e-07
FAM216B	-5.55541	1.16484	1.13356e-08	6.98112e-07
FBXO28	-1.79235	5.75933	1.14941e-08	7.05712e-07
DYDC1	-6.12603	-3.29557	1.52481e-08	9.33342e-07
THRSP	-5.80126	1.75886	1.57926e-08	9.63731e-07
DAW1	-5.63258	-0.157167	1.59994e-08	9.73394e-07
C21orf128	-3.93745	-1.31823	1.64261e-08	9.96338e-07
TUSC5	-5.81096	1.86632	1.64817e-08	9.96696e-07
SFN	-4.64507	1.32685	1.68508e-08	1.01596e-06
LOC100506776	-3.2118	0.865229	1.94772e-08	1.17079e-06
CYP4F22	-3.42192	-1.28123	1.99614e-08	1.19631e-06
C8orf47	-4.44062	-0.613351	2.03478e-08	1.21584e-06
NWD1	-5.02427	2.00593	2.10184e-08	1.25219e-06
ZNF750	-3.59581	0.117211	2.12215e-08	1.26054e-06
PRG4	-4.78777	5.71688	2.16435e-08	1.28182e-06
SULT1E1	-5.11131	-0.859329	2.60381e-08	1.53755e-06
AZGP1	-5.52245	0.90787	2.68356e-08	1.57999e-06
FER1L5	-2.7252	-0.782643	2.69265e-08	1.58071e-06
CCDC81	-2.82549	0.524028	2.76583e-08	1.61894e-06
UTF1	-3.58779	-3.26578	2.88929e-08	1.68629e-06
EFCAB10	-2.75651	-0.83943	3.14877e-08	1.8324e-06
RIBC1	-2.87266	0.891307	3.25945e-08	1.89133e-06
CLEC10A	-3.21348	2.21602	3.69573e-08	2.13831e-06
LOC100128338	-4.17272	0.367424	3.90719e-08	2.25416e-06
CSN1S1	-4.50719	-3.58637	3.98432e-08	2.29207e-06
IFLTD1	-4.76951	-1.67244	4.0946e-08	2.34878e-06
RASSF6	-4.89403	0.966795	4.2086e-08	2.4073e-06
HBA1	-4.12474	2.19894	4.4414e-08	2.53324e-06
KIAA1751	-3.1994	-0.77905	4.49452e-08	2.55627e-06
HCAR1	-3.15495	0.55554	4.87765e-08	2.76634e-06
MIR3189	-4.01939	-2.87081	5.3148e-08	3.00578e-06
TP53AIP1	-3.85309	-1.23608	5.52904e-08	3.11816e-06
AKR1C1	-3.62586	3.46761	5.94277e-08	3.3421e-06
SPAG17	-3.23611	2.78814	5.97766e-08	3.35233e-06
PPP1R32	-2.41461	1.40055	6.70692e-08	3.75083e-06
SCN10A	-4.72878	-2.02817	7.43967e-08	4.14906e-06
FGF20	-3.88078	-3.09624	8.12408e-08	4.5182e-06
C7orf63	-2.289	2.3843	8.25084e-08	4.57603e-06
CFD	-3.28133	6.11314	8.31602e-08	4.59947e-06
ATP2C2	-4.11009	2.06026	8.42715e-08	4.64813e-06
SNX31	-3.69729	-2.17075	8.65145e-08	4.75877e-06
DEGS2	-3.48941	-0.238867	8.95717e-08	4.91347e-06
GPR110	-6.05243	0.631723	9.47737e-08	5.18466e-06
EPB42	-4.4029	-2.37482	1.07419e-07	5.86045e-06
DCDC5	-3.89651	-0.751242	1.16553e-07	6.34158e-06
C20orf195	-3.38977	-1.77597	1.23151e-07	6.68244e-06
HS3ST6	-4.79957	-1.93607	1.30507e-07	7.06251e-06
GRHL1	-2.56681	1.93833	1.36498e-07	7.36688e-06
CCDC146	-2.47689	3.39912	1.51515e-07	8.15541e-06
CES4A	-3.1254	2.17062	1.57581e-07	8.45921e-06
ANKK1	-3.29545	-0.903976	1.62403e-07	8.69482e-06
LOC440896	-4.0779	-2.86964	1.72441e-07	9.20768e-06
SORL1	-2.63585	4.15893	1.8616e-07	9.91386e-06
SPAG6	-4.93429	1.96461	1.88684e-07	1.00217e-05
C1orf87	-5.11243	0.0150153	1.9435e-07	1.02954e-05
TMPRSS11E	-4.10555	-3.13949	1.96875e-07	1.04017e-05
EFCAB6	-2.60494	0.6756	2.52431e-07	1.3302e-05
CYP2W1	-3.83598	-1.39902	2.63125e-07	1.38292e-05
NHLRC4	-2.90183	0.470737	2.66258e-07	1.39574e-05
C9orf135	-4.40496	-0.231775	2.67619e-07	1.39922e-05
ADIPOQ	-6.53011	5.30949	2.729e-07	1.42312e-05
IKZF2	-2.50599	3.21429	2.74881e-07	1.42974e-05
GAS2L2	-4.56572	0.576294	2.86343e-07	1.4855e-05
ELF3	-4.83283	3.71244	3.17213e-07	1.64141e-05
FBXO15	-3.55577	-0.119282	3.18115e-07	1.64185e-05
TRIM31	-3.19857	-2.02906	3.28673e-07	1.69199e-05
SLC22A4	-2.57857	1.85444	3.30798e-07	1.69858e-05
TEKT1	-6.59344	0.708531	3.34307e-07	1.71222e-05
FUT3	-4.7556	0.103519	3.36622e-07	1.71968e-05
S100A2	-3.02298	3.15748	3.53438e-07	1.80101e-05
CEBPA	-2.45175	4.39012	3.72924e-07	1.89549e-05
TACR1	-3.99538	0.58885	3.76651e-07	1.90772e-05
G0S2	-3.81807	5.08864	3.77655e-07	1.90772e-05
ATP6V1C2	-2.13709	1.50253	3.78181e-07	1.90772e-05
C4orf22	-4.32527	-1.44839	3.79804e-07	1.91111e-05
STATH	-5.99323	-2.66912	3.82899e-07	1.92187e-05
CLDN16	-3.96185	-1.8555	4.02059e-07	2.013e-05
PADI3	-4.92313	0.383191	4.06947e-07	2.0324e-05
NME9	-3.12143	-0.235681	4.16532e-07	2.07511e-05
RBBP8NL	-5.26986	-2.05402	4.26642e-07	2.12022e-05
WDR66	-2.92832	2.03561	4.43506e-07	2.19859e-05
LINC00675	-4.44334	-3.17906	4.69364e-07	2.32104e-05
KIAA1377	-2.122	3.10752	4.81389e-07	2.37466e-05
TJP3	-4.27499	1.17154	5.14859e-07	2.53354e-05
CASC2	-2.44155	0.449848	5.57292e-07	2.73563e-05
SPAG8	-2.49825	1.55072	5.71111e-07	2.79663e-05
NPY5R	-4.21763	-1.47225	6.07909e-07	2.96958e-05
LOC201651	-3.77282	-1.93816	6.18736e-07	3.01481e-05
C1orf228	-2.49202	0.907077	6.21136e-07	3.01481e-05
MFSD4	-3.09406	1.75268	6.21673e-07	3.01481e-05
LRRIQ1	-3.95234	1.21244	6.63423e-07	3.20953e-05
STMND1	-4.55291	-0.376216	6.75896e-07	3.26201e-05
CD1C	-3.2881	1.49254	6.9864e-07	3.36369e-05
CYP2A6	-3.4098	-1.75608	7.61714e-07	3.65859e-05
NTRK2	-3.27862	5.15075	7.75012e-07	3.71359e-05
BIK	-3.31491	-0.934118	7.88178e-07	3.76768e-05
UCKL1-AS1	-2.63761	0.500058	8.10347e-07	3.86445e-05
ABCA6	-2.97517	3.05237	8.25237e-07	3.92613e-05
HEPACAM	-4.31781	-0.85756	8.54821e-07	4.05727e-05
CCDC153	-2.28369	0.503037	8.78625e-07	4.16041e-05
FOXA1	-4.19658	2.33545	8.97481e-07	4.2397e-05
SCARA5	-3.32573	5.3599	9.20182e-07	4.33674e-05
PIH1D2	-2.04992	0.730535	1.06546e-06	5.00966e-05
STYK1	-3.08429	-0.241646	1.12666e-06	5.28504e-05
BSND	-4.49053	-3.31091	1.19619e-06	5.59809e-05
WDR78	-2.51835	2.468	1.25729e-06	5.87039e-05
ALS2CR12	-2.33101	0.318507	1.26192e-06	5.87833e-05
CLDN10	-3.84247	1.15736	1.27826e-06	5.94064e-05
TCTE1	-2.89262	-0.633851	1.28662e-06	5.96568e-05
C15orf48	-2.80576	0.880171	1.30673e-06	6.04497e-05
FZD4	-2.10443	6.17193	1.37807e-06	6.34676e-05
MAATS1	-3.64383	1.76747	1.37829e-06	6.34676e-05
MEDAG	-3.20049	4.03499	1.448e-06	6.65252e-05
DNAH6	-3.13006	1.95774	1.48187e-06	6.79258e-05
C1orf158	-4.17994	-0.609345	1.52266e-06	6.96367e-05
GAL3ST2	-3.82769	-1.37913	1.60543e-06	7.32549e-05
SLCO1B3	-4.59549	-2.73678	1.6156e-06	7.35517e-05
MIR429	-5.28892	-2.86071	1.7142e-06	7.78641e-05
RNF157-AS1	-3.58427	-1.64227	1.71837e-06	7.78777e-05
GPAM	-1.97136	4.79053	1.76013e-06	7.95903e-05
MAP3K5	-1.80516	4.05983	1.77814e-06	8.0224e-05
XAGE3	-5.11013	-2.04109	1.83542e-06	8.26227e-05
CHST9	-5.58583	0.973016	1.92805e-06	8.65985e-05
PPP1R36	-2.46912	0.179445	2.05741e-06	9.22021e-05
PLIN4	-4.83146	7.44673	2.10843e-06	9.42782e-05
LRG1	-3.3196	1.14299	2.15052e-06	9.59464e-05
FXYD3	-4.23701	3.09299	2.21834e-06	9.87531e-05
COX6B2	-2.83806	-1.01049	2.25581e-06	0.000100199
MUC20	-3.10749	2.78756	2.29739e-06	0.00010182
AK8	-2.4235	0.00331246	2.32622e-06	0.000102871
PNPLA2	-1.96909	6.46327	2.3721e-06	0.00010467
LEPR	-2.57295	4.97573	2.46318e-06	0.000108123
VWA2	-3.47821	1.62616	2.46519e-06	0.000108123
PRSS22	-4.33246	0.0981058	2.46652e-06	0.000108123
FAM83F	-3.20868	-0.419445	2.52327e-06	0.00011037
RETSAT	-1.80866	5.92628	2.52894e-06	0.000110377
LRTOMT	-1.75558	2.67868	2.72329e-06	0.000118602
TEX26-AS1	-3.309	-2.29726	2.7386e-06	0.00011901
TMEM236	-3.09795	-1.47842	2.74496e-06	0.000119029
LOC100505841	-3.84024	-3.16051	2.78134e-06	0.000120347
WFDC6	-4.86006	-1.3461	2.78784e-06	0.000120369
PLEKHH1	-2.53002	2.66104	2.88548e-06	0.000124317
ATP8B4	-2.3866	3.40449	2.93423e-06	0.000126147
TMC4	-3.02265	2.57263	3.08532e-06	0.000132359
GPBAR1	-2.62619	0.0756941	3.19421e-06	0.000136738
PPAP2C	-3.04158	2.415	3.22008e-06	0.000137552
SEC14L3	-5.5148	-1.12651	3.33487e-06	0.000142153
ILDR1	-3.25214	0.516821	3.40671e-06	0.000144908
CYP1A1	-3.63637	-1.46828	3.41743e-06	0.000145057
FAM83E	-4.2399	0.920271	3.49145e-06	0.000147745
EHF	-4.41541	3.22203	3.49548e-06	0.000147745
PPP1R1B	-3.62791	2.60832	3.60391e-06	0.000152008
DTX1	-2.68314	1.70154	3.71154e-06	0.000156219
CCDC40	-2.06024	2.57619	3.86753e-06	0.000162444
NEK5	-3.51194	-0.860936	3.96932e-06	0.000166372
SLC19A3	-4.11955	1.92755	4.0011e-06	0.000167355
FOXJ1	-4.53912	2.24657	4.04095e-06	0.00016867
TLCD2	-2.00512	3.35311	4.28663e-06	0.000178553
MYB	-2.68182	0.997638	4.30811e-06	0.000179076
SYTL1	-2.86663	2.38733	4.36436e-06	0.00018104
OVOL1	-3.62146	-2.31085	4.4503e-06	0.000184224
BAIAP3	-2.80999	2.30988	4.4667e-06	0.000184522
AQP10	-3.53489	-2.60525	4.64302e-06	0.000191412
CDS1	-2.96799	2.44823	4.67938e-06	0.000192516
ANKRD22	-3.00761	0.344305	4.84014e-06	0.000198723
AQP6	-2.53244	-1.54308	4.87131e-06	0.000199594
STAP1	-2.95022	-1.15118	5.07418e-06	0.000207242
FAM3B	-3.10697	0.781852	5.07859e-06	0.000207242
KRT19	-4.71099	4.74951	5.09983e-06	0.000207686
DYNC1I1	-2.39759	4.54413	5.22817e-06	0.000212482
CCDC64B	-4.02378	0.931205	5.66225e-06	0.000229658
TMC5	-4.12899	2.53175	5.71972e-06	0.000231522
SLIT1	-2.17042	-0.14292	5.74709e-06	0.000232161
SOX15	-2.20616	0.24646	5.82083e-06	0.000234668
TCTEX1D1	-2.81391	1.40329	6.30746e-06	0.000253777
IL5RA	-4.03949	0.206394	6.5592e-06	0.000263378
CAB39L	-2.27602	3.55192	6.633e-06	0.00026581
IRF6	-3.30312	2.69296	6.70111e-06	0.000268004
TEX37	-4.66458	-3.01374	6.91562e-06	0.000276034
SPEF2	-2.18895	2.74224	6.99944e-06	0.000278825
XKRX	-3.387	-0.753641	7.32048e-06	0.000291036
PRKAR2B	-2.43458	3.67464	7.4381e-06	0.000294376
LGALS7B	-4.05906	-1.06412	7.44176e-06	0.000294376
AQP7P1	-3.73636	-0.794986	7.44848e-06	0.000294376
FCER1A	-2.98674	1.5809	7.46885e-06	0.000294601
F3	-2.47682	5.16737	7.50864e-06	0.00029559
CAPS2	-2.47159	0.755266	7.57556e-06	0.000297641
IKBKE	-2.08147	3.53811	7.68901e-06	0.000301509
JAKMIP2-AS1	-3.33302	-2.84531	7.75068e-06	0.000303334
MAPK15	-3.61893	2.18246	7.81596e-06	0.000305294
ODF3B	-2.20128	3.89783	7.87538e-06	0.000307017
CCDC147	-2.87673	0.298154	7.94264e-06	0.000309039
LOC645638	-3.06952	0.481005	7.97991e-06	0.000309889
CCDC103	-2.17254	0.85886	8.84217e-06	0.000342711
RIMS1	-3.4786	1.72806	8.97034e-06	0.000347009
KRT17	-3.53533	3.22871	9.10014e-06	0.000351353
RERE	-1.76646	6.83691	9.20665e-06	0.000354783
FAM180B	-3.76564	0.400819	9.44701e-06	0.000363348
EPPIN-WFDC6	-4.1628	-2.23968	9.53907e-06	0.000366187
PDP2	-1.63244	3.82779	9.95158e-06	0.000381293
TRPV6	-3.81849	-1.53259	1.03148e-05	0.000394459
ATP12A	-4.31249	-1.56605	1.08803e-05	0.000415293
ADIRF	-2.94899	5.28232	1.09805e-05	0.000418321
FGL2	-2.01386	4.95383	1.10711e-05	0.000420974
PTGDS	-3.15132	5.87393	1.14952e-05	0.000435673
AGMO	-3.5042	1.08697	1.1501e-05	0.000435673
KLHDC7A	-4.56046	-0.0715422	1.17905e-05	0.000445795
TGFBR3	-2.38916	5.18944	1.23464e-05	0.000465936
TNXB	-3.52359	5.92016	1.25076e-05	0.000471137
PI16	-4.31163	4.61751	1.29554e-05	0.000487091
EPHX3	-2.28034	-0.225071	1.30426e-05	0.00048945
CALN1	-3.58155	0.521078	1.31129e-05	0.000491169
SLC51A	-2.14236	0.62429	1.31883e-05	0.000493077
CHL1	-3.40045	3.72448	1.36915e-05	0.000510939
TMEM61	-3.66295	-1.88905	1.39111e-05	0.000518169
MED10	-1.7037	5.57369	1.40876e-05	0.000523771
CCBP2	-2.56553	0.313188	1.41142e-05	0.000523792
EPPIN	-4.0002	-1.36752	1.44156e-05	0.000533989
CD1B	-3.45525	-1.2204	1.45848e-05	0.00053926
GBP7	-3.36363	-1.23673	1.50412e-05	0.000555113
SH2D1A	-3.03662	0.526872	1.53335e-05	0.000564865
FLJ22447	-2.89231	0.571008	1.55507e-05	0.000571816
PTRH1	-1.56556	3.06681	1.59262e-05	0.000584554
SCN9A	-2.72174	2.99892	1.60171e-05	0.000586816
LINC00643	-3.47093	-2.60043	1.6129e-05	0.000589778
CYP8B1	-3.09356	-2.52199	1.61567e-05	0.000589778
MMP12	-3.84806	1.7323	1.62455e-05	0.000591945
FAM179A	-3.16628	1.70547	1.63035e-05	0.000592982
ITGB4	-2.41166	4.43038	1.65439e-05	0.000600635
C9orf9	-1.82698	1.3904	1.74277e-05	0.00063158
UPK1B	-4.26526	-1.06364	1.74922e-05	0.000632776
DUSP2	-2.65368	3.8659	1.81322e-05	0.000654749
PPL	-3.32139	4.40914	1.81981e-05	0.000655947
LRRC26	-4.67376	-1.37464	1.83368e-05	0.000659763
C11orf92	-2.98341	1.73545	1.83819e-05	0.000660203
OTX1	-3.09437	1.47516	1.92233e-05	0.00068919
UGT1A10	-5.13965	-3.32932	2.01788e-05	0.000722158
C7orf41	-2.19727	5.8568	2.05405e-05	0.000733794
ZMYND12	-2.22859	0.634033	2.08624e-05	0.00074397
PLP1	-3.33096	1.05511	2.15026e-05	0.000765236
ST14	-2.35682	3.93786	2.1535e-05	0.000765236
PERP	-2.91612	5.10574	2.15966e-05	0.000766068
BBOX1	-3.28671	0.40811	2.18766e-05	0.000774631
C1orf141	-4.41697	-2.30371	2.20837e-05	0.000780588
STEAP2	-1.90683	3.71759	2.37663e-05	0.000838587
KRT42P	-3.3169	-1.80204	2.38238e-05	0.000838687
CCDC113	-2.12641	2.98084	2.38527e-05	0.000838687
HBA2	-3.16001	4.53346	2.42623e-05	0.000851597
BTC	-3.49622	-0.551718	2.44773e-05	0.000857644
LOC100128770	-3.3516	-0.922521	2.48027e-05	0.000867533
CCR6	-2.73709	-0.338266	2.48973e-05	0.000869326
HOXD13	7.9589	3.55834	2.53268e-05	0.000882789
AKR1C2	-3.56671	4.16792	2.54541e-05	0.000885687
MFSD6L	-3.22298	-1.47434	2.59091e-05	0.00089996
FLJ26850	-2.70281	-1.71223	2.74859e-05	0.000953081
C7orf57	-2.82029	0.49818	2.80657e-05	0.000971508
FAM71E2	-3.75522	-2.6695	2.81355e-05	0.000972249
DNALI1	-2.78111	2.72094	2.85178e-05	0.000983766
DOCK11	-1.60927	5.00429	2.8712e-05	0.000988766
HACL1	-1.65111	3.88575	2.97468e-05	0.00102265
GBP6	-4.02689	-0.217116	3.05407e-05	0.00104814
COL17A1	-2.8856	1.71248	3.06557e-05	0.0010503
CCDC80	-1.88942	8.07491	3.17417e-05	0.00108565
TMPRSS13	-3.21919	0.603423	3.18008e-05	0.00108583
SERPINB2	-3.43608	-1.77578	3.193e-05	0.00108838
TMEM211	-4.00341	-3.0471	3.28115e-05	0.00111515
HCAR2	-3.16734	0.82508	3.28262e-05	0.00111515
KLRD1	-2.77808	0.873367	3.32659e-05	0.00112817
KLHL32	-3.08004	-0.994355	3.4112e-05	0.00115492
LINC00035	-2.79515	-1.70827	3.43061e-05	0.00115954
LRRC23	-1.95117	3.43443	3.44142e-05	0.00116123
VWA3B	-3.40227	1.06476	3.72423e-05	0.00125455
ITGAM	-2.10065	4.47291	3.83195e-05	0.00128653
SIX3	-3.33815	1.07491	3.83196e-05	0.00128653
C1orf110	-3.67898	0.389641	3.85201e-05	0.0012911
SLC9A3R1	-1.85632	4.59729	3.88949e-05	0.00130149
DCDC2B	-1.96259	1.79982	3.97898e-05	0.00132922
GALNT4	-1.93478	-1.62503	3.99376e-05	0.00133152
SPATA17	-2.24095	0.663504	3.99912e-05	0.00133152
PPP2R1B	-1.44021	4.98394	4.0684e-05	0.00135234
HBB	-3.12386	6.46875	4.14299e-05	0.00137486
EFEMP1	-2.8384	6.63124	4.32004e-05	0.00143124
PCDP1	-3.50543	1.32948	4.37422e-05	0.00144681
SIDT1	-2.12746	1.14873	4.40473e-05	0.0014545
ARHGAP26	-1.51755	4.25957	4.42849e-05	0.00145995
S100A9	-2.7246	4.20501	4.60352e-05	0.00151516
ERV3-1	-1.80922	3.52086	4.90813e-05	0.00161278
GLIS3-AS1	-3.31953	-1.37602	5.0931e-05	0.00167082
MEIG1	-2.50185	-1.88685	5.21478e-05	0.00170795
TTLL9	-2.80442	-0.456805	5.25858e-05	0.00171949
SEMA3C	-2.59228	6.3865	5.34144e-05	0.00174374
SLC15A2	-2.53711	3.47188	5.38401e-05	0.00175479
FAM83C	-3.20635	-2.38799	5.41428e-05	0.00176179
SPATA4	-3.11893	-1.39903	5.61701e-05	0.0018248
NR2E1	-3.95639	-0.87538	5.65716e-05	0.00183488
RFPL4B	-3.61423	-1.97636	5.83004e-05	0.0018879
SGK2	-2.61953	-0.666473	5.91174e-05	0.00190903
SPTSSB	-2.81643	-1.23665	5.91432e-05	0.00190903
MORN3	-2.08692	-0.548545	5.99517e-05	0.00193202
BCAS1	-3.33957	0.941578	6.13279e-05	0.00197103
CORO2A	-2.5761	1.99407	6.13585e-05	0.00197103
DPYS	-2.98447	-0.533442	6.66785e-05	0.0021385
C16orf71	-2.18898	0.804794	6.72682e-05	0.00215398
CXCR2	-2.53315	-0.436144	6.80871e-05	0.00217673
AGPAT2	-1.59096	5.37156	6.90206e-05	0.00220306
ADD3	-1.42373	6.23942	7.10799e-05	0.00226519
SKAP1	-2.42533	0.752078	7.16122e-05	0.00227854
RP1	-3.11341	-1.1949	7.31671e-05	0.0023232
LOC100130298	-2.59172	-1.20525	7.32471e-05	0.0023232
EPHB6	-2.29774	2.84476	7.41788e-05	0.00234903
MFAP5	-3.74577	5.9114	7.90942e-05	0.00250075
PDE8B	-2.21521	3.00101	8.06467e-05	0.00254582
GJB1	-4.18374	-1.28346	8.09743e-05	0.00255215
FGF2	-2.60882	2.6968	8.16532e-05	0.00256952
SPA17	-1.83787	1.98131	8.27583e-05	0.00259889
KCNE3	-1.70188	4.08132	8.28454e-05	0.00259889
OR56B4	-3.32141	-2.75012	8.31938e-05	0.00260575
BPIFA2	-3.83433	-3.0851	8.38209e-05	0.0026213
LRRN4CL	-2.83872	3.14401	8.60146e-05	0.0026841
GRHL2	-4.01457	1.17272	8.60966e-05	0.0026841
CEACAM5	-5.10836	0.642206	8.63706e-05	0.00268847
KLK12	-3.18201	-2.82698	8.688e-05	0.00270014
SLC16A14	-2.22677	2.35181	8.76801e-05	0.00271884
JMJD4	-1.64523	3.43881	8.78238e-05	0.00271884
SPATA22	-3.21998	-0.619334	8.80185e-05	0.00271884
FFAR4	-2.62329	1.07275	8.80234e-05	0.00271884
KCNJ16	-2.78413	-1.82851	9.42897e-05	0.00290792
FAM213A	-2.07006	4.73938	0.000101	0.00311009
PTPRF	-1.83566	6.49628	0.000101469	0.00311975
ATP2B4	-1.43039	7.40131	0.000103623	0.00318111
MAP6	-2.39625	2.44731	0.000104462	0.00320196
CLC	-3.21821	-3.38459	0.000105814	0.00323844
ELF5	-4.57257	0.25812	0.000106142	0.00324356
SYT12	-2.8545	4.47813	0.000106607	0.00325281
CBLN1	-3.39129	-1.51575	0.000107804	0.00328434
C4orf19	-2.78151	-0.25332	0.000110158	0.00335098
CLDN7	-2.62355	3.21219	0.000110923	0.00336914
FGFBP1	-4.45265	-1.91092	0.000115065	0.00348967
SPINT2	-2.5176	4.46609	0.000115441	0.0034958
C6orf58	-2.63377	-3.08965	0.000116241	0.0035147
OSCP1	-1.60242	2.54783	0.000117469	0.00354651
MAT1A	-3.65735	-0.680521	0.000122857	0.00370362
TSNAXIP1	-1.77643	1.77032	0.000123162	0.00370575
MAPKAPK2	-1.50985	7.31226	0.000123297	0.00370575
CHST4	-3.78476	-2.37346	0.000127535	0.00382739
S100P	-3.57026	1.11645	0.000127954	0.00382933
PIGR	-4.69314	5.13736	0.000127981	0.00382933
NT5E	-1.87177	5.76165	0.000128701	0.00384512
MMD	-1.53221	4.51035	0.000129002	0.00384841
EPB41L4B	-2.52933	2.52329	0.000130081	0.00387484
STOX1	-2.7224	1.06984	0.00013059	0.00388424
CETN2	-1.23033	5.32341	0.000132034	0.00392138
RAPGEFL1	-1.69607	3.03918	0.000133605	0.00396218
FAAH2	-2.43393	0.163502	0.00013986	0.00414156
CHRDL1	-3.50091	5.22766	0.000141752	0.00419139
PCSK6	-2.38716	3.40106	0.000144835	0.00427625
NEK11	-1.90976	2.67457	0.000148404	0.00437521
CFP	-2.15436	1.05459	0.000149183	0.00439171
C6	-3.74439	0.874416	0.000149852	0.00440495
P2RY12	-2.88816	-0.383121	0.000151741	0.00445395
PGLYRP4	-3.57673	-3.0249	0.000152653	0.00447417
HOXD11	7.46909	2.16369	0.000154239	0.00451186
AMICA1	-2.25786	3.34704	0.000154388	0.00451186
COL28A1	-2.45992	0.610707	0.00015525	0.00453044
EFCAB4A	-1.9744	2.92501	0.000159599	0.00465062
SPATA6L	-2.03791	0.946351	0.000160865	0.00468072
XDH	-2.85157	0.0184117	0.000162526	0.00472218
CLEC3B	-2.64884	5.56319	0.000163743	0.00475068
MIR200A	-3.93008	-3.0376	0.000166455	0.00482238
PAGE1	-4.31049	-0.748485	0.000166999	0.00483117
NMNAT2	-2.1466	1.25271	0.000176529	0.00509953
CILP	-3.06316	4.32183	0.000182264	0.00525763
LOC84931	-3.50001	-3.38825	0.000184668	0.00531934
AHNAK	-1.56919	10.4366	0.000190723	0.00548589
GSTA3	-3.41268	-2.5474	0.00019126	0.00549345
C2CD2	-1.4123	4.90163	0.000192158	0.00551136
PPARG	-1.93617	4.15885	0.000195501	0.00559925
CYTIP	-2.0359	2.78635	0.000200475	0.00573352
KLF5	-2.15952	4.82515	0.000202172	0.00577384
FCGR3B	-3.01556	0.131042	0.0002031	0.00579209
USP43	-2.88252	1.08857	0.000207755	0.00590963
KRTCAP3	-2.1198	0.958682	0.000207846	0.00590963
ZPBP2	-3.85895	-3.42001	0.000208104	0.00590963
LOC100292680	-2.45138	-0.168932	0.00021079	0.00597746
CCL22	-2.57353	0.109491	0.000213532	0.00604667
NHLH2	8.61147	2.01549	0.000217563	0.00615214
TGFA	-2.68645	3.96306	0.00022215	0.006273
CD36	-2.36684	7.46482	0.000224453	0.00632913
RDH5	-2.77372	0.894301	0.000224922	0.00633348
EIF2D	-1.26824	5.63292	0.000227722	0.00640332
PCK1	-4.25682	0.671146	0.000230501	0.00647241
FGF18	-2.68509	1.17255	0.000233957	0.00656029
LOC100507053	-1.79388	2.12156	0.000235995	0.00660819
SIRPB2	-2.04113	2.00508	0.000239916	0.00670862
PC	-1.41864	5.05012	0.000242903	0.00678271
ADAMTS15	-2.49903	2.99654	0.000246602	0.00687643
SERPINB4	-4.43287	1.2316	0.000252558	0.00703274
VWA5A	-1.86849	4.81706	0.000253912	0.00705835
PCDHB6	-2.61404	2.92663	0.000254181	0.00705835
FOXN4	-3.19441	-1.73332	0.000258322	0.00716343
ZNF117	-1.59321	4.81656	0.000263593	0.00729954
PTK6	-2.27645	0.640362	0.000267117	0.0073809
GPR64	-2.19719	1.8378	0.000267267	0.0073809
GPR56	-1.66007	4.29371	0.000267751	0.00738411
AQP7	-3.73884	3.07353	0.000270704	0.00745531
C1orf115	-2.15847	3.8228	0.000274777	0.00755713
MPZL2	-1.86263	4.28646	0.000275983	0.00757991
MRC1	-2.22574	3.80308	0.000278259	0.00763198
DZANK1	-1.54467	1.60887	0.000280936	0.00769489
ANKDD1B	-2.51263	-0.532994	0.000289502	0.00791871
SPATA18	-2.3638	3.78726	0.000293179	0.00798762
ABCA2	-1.47613	6.21176	0.000293183	0.00798762
GDF10	-2.93889	2.74967	0.000293215	0.00798762
NUGGC	-3.00665	0.409505	0.000294511	0.00801205
TMEM254	-1.2033	3.91979	0.000295035	0.00801545
NBPF4	7.11505	1.33723	0.00029945	0.00812441
LPL	-2.06291	6.88443	0.000301481	0.00816846
ABCC2	-2.02451	0.680647	0.000303918	0.00822339
NSUN7	-2.36651	1.89836	0.000310338	0.0083858
AXDND1	-2.20652	-2.21962	0.000314013	0.00847237
SAMHD1	-1.52275	5.50861	0.000314386	0.00847237
DNAH9	-3.5662	2.2021	0.000314948	0.00847614
TIMP4	-2.2419	2.85633	0.000322176	0.00865906
LCN10	-3.02225	-0.0397929	0.000323579	0.00868516
KCNQ3	-2.24754	2.33963	0.000335815	0.00900153
LNX1-AS2	-2.9329	-2.85824	0.0003411	0.00913101
TTC12	-1.58503	3.05617	0.000344989	0.00922282
HBM	-3.32228	-2.81591	0.000346785	0.00925852
DIXDC1	-1.34488	4.94799	0.000355561	0.00948022
ZMIZ1-AS1	-1.86269	0.160037	0.0003634	0.00967636
CST6	-2.80736	1.14748	0.00037249	0.00990526
DNASE1L3	-2.70567	1.68179	0.000376023	0.00998497
C19orf80	-2.75723	-0.771031	0.000376858	0.00998497
PLEKHA6	-2.65627	2.24448	0.000376979	0.00998497
SRCIN1	-2.16975	0.881198	0.000378168	0.0100033
LRRC37A11P	-2.64407	-2.67491	0.000379261	0.010019
PLEKHA7	-1.88963	2.48539	0.00038056	0.0100401
LINC00619	-3.13165	-1.23364	0.000386321	0.0101787
LAMB4	-1.95912	-0.945937	0.000387821	0.0102048
FAM221B	-2.64297	-2.18312	0.000392176	0.0102998
NMT2	-1.27583	4.20253	0.000392458	0.0102998
ZNF295-AS1	-3.3574	-2.81819	0.000394684	0.0103382
TNFAIP8	-1.45513	4.09314	0.000394948	0.0103382
GCLM	-1.44202	4.09466	0.000395733	0.0103452
SLC4A11	-2.07973	2.03292	0.000400168	0.0104475
FLJ35946	-1.96367	-0.652526	0.000403166	0.0105122
LINC00479	-3.21691	-3.28125	0.000404099	0.0105228
IL1RAP	-1.56152	3.76576	0.000414397	0.010777
TLR5	-1.60535	2.4054	0.000417653	0.0108446
CCDC148	-2.16508	-0.534645	0.000418075	0.0108446
ELMOD3	-1.19921	4.68472	0.000426226	0.0110417
SLPI	-3.40015	6.29993	0.000429146	0.011089
GPD1	-3.83377	6.14545	0.000429293	0.011089
HCAR3	-2.51149	-0.770488	0.000429707	0.011089
STK32A	-2.67636	-0.19646	0.000432067	0.0111356
FDXR	-1.49704	3.57507	0.00043381	0.0111662
KIAA1257	-2.10566	-0.895536	0.00043795	0.0112461
FLJ35282	-2.56304	1.10177	0.000438074	0.0112461
PRRG4	-2.46524	2.27573	0.000438596	0.0112461
CA2	-2.40025	6.97362	0.000440126	0.0112709
SYNE3	-1.73884	3.14442	0.000448485	0.0114704
C4orf47	-2.2337	1.07908	0.000449901	0.0114919
GZMA	-3.00663	4.37427	0.000450486	0.0114923
WDR49	-3.50529	0.107129	0.000457143	0.0116473
KRT79	-2.94617	-0.9893	0.000459741	0.0116986
ULBP1	4.99608	3.31488	0.000463745	0.0117801
RBM47	-1.91978	4.10862	0.000464115	0.0117801
SLC13A2	-4.2812	-0.735682	0.000464768	0.0117818
NCOA7	-1.40604	4.87467	0.000466071	0.0117999
HMGN2P46	-1.7887	-1.58709	0.000471217	0.0119151
TEKT3	-1.91537	-0.290812	0.000474238	0.0119764
CCDC178	-2.48402	-0.137011	0.000476908	0.0120287
SIK2	-1.2144	5.06558	0.000480929	0.0121149
MGC32805	-2.6638	-1.80345	0.000481819	0.0121221
ARHGEF16	-2.55296	1.67211	0.000483864	0.0121584
KRT6B	-3.52785	-1.69116	0.000485015	0.0121721
F11R	-1.90585	5.31867	0.000487421	0.0122172
CLEC5A	-2.23216	2.84032	0.000488646	0.0122326
CYP4X1	-2.38078	2.04485	0.000491808	0.0122964
ABCA8	-2.63333	4.22373	0.000492639	0.0123019
ABCC3	-1.80515	3.94595	0.000497988	0.01242
PRKAG2	-1.18424	4.0894	0.00049942	0.0124403
PTAFR	-1.7865	3.95459	0.000505204	0.0125687
DYRK3	-1.60318	3.416	0.000507265	0.0126044
LTF	-2.22347	1.52111	0.000508394	0.0126168
CXCL17	-4.62205	3.46898	0.000510442	0.012652
ARMC2	-1.49625	2.14241	0.000518755	0.0128422
VCAM1	-2.43627	6.64869	0.000520642	0.0128731
BMX	-2.65878	1.11196	0.000528344	0.0130474
C1orf106	-2.63154	1.30873	0.000529299	0.013055
DBX2	-3.21024	-2.14614	0.000533111	0.0131328
PPIE	-1.22192	5.9858	0.000537815	0.0132182
S100A8	-2.76501	2.66269	0.000537894	0.0132182
CWH43	-4.57181	-1.78589	0.000539109	0.0132319
LOC100289495	-1.65087	0.130753	0.000541206	0.0132654
LRRC34	-1.51315	2.02443	0.000541797	0.0132654
DACT2	-3.35291	0.434044	0.00054762	0.0133917
FFAR2	-2.31952	-1.40823	0.000553589	0.0135212
C2orf40	-2.79488	1.85967	0.000556464	0.0135749
ARMC4	-2.23177	1.7041	0.000559203	0.0136217
LCN12	-2.37913	-2.1371	0.000559742	0.0136217
CDH22	-2.77977	-1.17604	0.000562631	0.0136755
CRHBP	-2.00956	0.155012	0.000564741	0.0137102
TFCP2L1	-2.197	2.81067	0.000569015	0.0137972
FCGR2B	-2.19547	3.38016	0.00057064	0.01382
C9orf72	-1.28163	4.24682	0.000574356	0.0138932
RASAL1	-1.97422	-1.20026	0.000575876	0.013913
MPPED1	-2.78964	-1.86122	0.000576561	0.013913
IL33	-2.97572	4.48591	0.000578227	0.0139364
BSPRY	-3.38904	0.135451	0.000579419	0.0139484
FAM47E	-2.43709	0.0530655	0.000581488	0.0139815
ASTL	-2.54306	-2.32156	0.00058266	0.0139929
FCAR	-2.37958	-1.56317	0.000584552	0.0140216
CCR2	-2.41105	1.37199	0.00058548	0.0140271
CCDC151	-1.9962	1.24077	0.000588041	0.0140716
DNAH1	-1.56155	3.97512	0.000604717	0.0144535
SOX2	-3.66229	2.27974	0.000613575	0.0146477
ASCL2	-1.86969	0.186677	0.000617802	0.0147245
FADS3	-1.26244	5.34964	0.000618257	0.0147245
DAPP1	-2.33267	2.04155	0.000625012	0.0148677
KLK11	-3.80114	0.488643	0.00063972	0.0151901
CLIC6	-2.28017	3.7108	0.000640075	0.0151901
CA10	-3.1596	-3.4249	0.00065911	0.0156233
TRABD2B	-2.48494	1.16945	0.000661589	0.0156636
HS3ST3A1	5.36756	4.30952	0.000663742	0.015696
CRYL1	-1.41635	4.19049	0.00066591	0.0157288
KLHL6	-1.81393	3.36766	0.000667397	0.0157454
ITGB8	-1.91013	3.24382	0.000670986	0.0158115
IFNGR1	-1.12201	6.52405	0.000679364	0.0159901
RCAN3AS	-2.43987	-2.51601	0.000698555	0.0164226
AKR1C3	-2.45138	3.84563	0.00070034	0.0164453
AQP2	-3.39828	-2.54565	0.000702336	0.0164729
ZMAT1	-1.85488	3.39041	0.000714692	0.0167431
CDO1	-2.32266	3.26385	0.000718156	0.0168047
MIR200B	-3.82946	-3.30465	0.00072293	0.0168967
TC2N	-2.33259	3.2858	0.000728868	0.0170157
CDC20B	-2.35633	-0.784659	0.000730978	0.0170284
WDR86-AS1	-2.45709	1.79156	0.000731773	0.0170284
SLC5A4	-2.05647	-0.383185	0.000732722	0.0170284
HLA-DRB6	-2.19138	3.14975	0.000732807	0.0170284
CXCR7	-1.52458	5.96395	0.000735313	0.0170669
DCTN1-AS1	-2.27425	-2.52161	0.000738271	0.0171158
LINC00271	-2.16179	-1.50677	0.000739427	0.0171228
RERGL	-3.13648	0.417868	0.00076314	0.0176516
CRIM1	-1.58869	6.39045	0.000772524	0.0178481
SLC9A4	-3.32877	-2.14218	0.000779862	0.0179969
EPS8L1	-1.96064	2.44865	0.000788479	0.0181748
FGF23	-3.37356	-1.10645	0.000793714	0.0182745
NEK10	-2.36892	0.115077	0.000806078	0.018538
LOC200772	-2.50435	-0.929515	0.000815745	0.0187246
LAMB3	-1.91887	4.67591	0.00081606	0.0187246
DIRC1	-3.19945	-2.21779	0.00082086	0.0188132
TTLL6	-2.627	-0.46625	0.00082774	0.0189493
PALM	-1.71857	4.20698	0.00082951	0.0189682
PROCR	-1.42873	4.6469	0.000847064	0.0193475
CCDC30	-1.57154	1.03676	0.000848097	0.0193491
PLA2R1	-1.55322	3.88714	0.000855186	0.0194887
ANKMY1	-1.47975	2.76284	0.000863666	0.0196597
MYCBPAP	-1.95359	1.12675	0.000864859	0.0196603
CMAHP	-1.88053	3.92061	0.000865653	0.0196603
ASTN1	-3.23928	2.04546	0.000867215	0.0196735
LOC100507632	-3.10766	0.524795	0.000875723	0.0198441
CLDN19	-2.71201	-2.31455	0.000878579	0.0198864
PVRL4	-2.19429	2.44034	0.000887678	0.0200697
SYT8	-2.55374	2.00709	0.000897205	0.0202623
RIIAD1	-2.98631	-1.48332	0.000906988	0.0204602
ABHD12B	-2.28767	-0.327431	0.000909795	0.0205005
SLC4A4	-1.91443	3.47591	0.000919264	0.0206907
ADAMTS14	-2.24514	5.0887	0.000922578	0.020742
ALOX5AP	-1.91156	3.82645	0.000932008	0.0209306
EMILIN2	-1.42161	5.49349	0.000942766	0.0211485
LOC728175	-1.88875	-1.85884	0.00094462	0.0211664
SERPINI2	-2.76302	-0.679128	0.000946599	0.0211871
FAM150B	-3.13777	1.02347	0.000969248	0.0216699
CREB5	-1.64954	4.49025	0.000974866	0.0217713
IDH1	-1.11072	6.15311	0.000987914	0.0220243
DYX1C1	-1.56287	-0.471981	0.00098918	0.0220243
SLFN13	-1.97291	3.20787	0.000989486	0.0220243
NOX1	-1.94591	-0.534237	0.00101261	0.0225141
NOG	-2.37997	2.98887	0.00101497	0.0225415
CAT	-1.49465	6.16558	0.0010372	0.023007
MIR4767	-2.03286	-2.87781	0.00103822	0.023007
FBXW10	-2.44688	-0.808018	0.00104207	0.0230495
RYK	-1.06224	6.36047	0.00104244	0.0230495
AIM1	-1.7056	5.08893	0.00105506	0.023303
IQGAP2	-1.69141	3.96539	0.00107107	0.0236307
TEX9	-1.56194	1.88038	0.00107569	0.0236829
C6orf132	-2.2317	2.40384	0.0010758	0.0236829
MLLT11	3.13392	6.20205	0.00108407	0.023817
ADH4	-2.8275	-2.82038	0.00108426	0.023817
CELSR1	-1.95061	4.60945	0.00109509	0.0240286
LINC00348	-3.84528	-2.80898	0.00109698	0.0240437
KLKB1	-2.02405	0.498071	0.00110597	0.0242143
ALAS2	-2.44714	-1.43375	0.00111835	0.0244588
MMP27	-3.18375	-2.58071	0.0011332	0.0247564
CD46	-1.04169	7.04958	0.0011379	0.0248322
KIAA1522	-1.40234	4.95026	0.00114986	0.025066
KRT222	-2.53323	-0.830736	0.00115821	0.0251961
SLC9C2	-2.09787	-1.098	0.00115845	0.0251961
NCF2	-1.68027	4.04648	0.00115959	0.0251961
CXorf21	-1.77743	1.26039	0.00116983	0.0253911
SCNN1A	-3.0487	3.53182	0.00119054	0.0258125
SPACA4	-2.74672	-2.78746	0.00119943	0.0259532
LPPR3	-2.52904	1.88824	0.00119961	0.0259532
FBN1	-2.03208	9.20587	0.00120248	0.0259707
B3GNT3	-2.57218	0.71814	0.00120301	0.0259707
AKAP12	-1.74637	5.94228	0.00121632	0.0262299
GLDN	-2.00229	3.49257	0.00121857	0.0262502
ACVR1C	-1.94697	2.22993	0.00122935	0.0264542
HIGD2B	-2.85828	-3.43902	0.0012381	0.0266139
SLC16A11	-2.27288	0.229658	0.0012643	0.027148
ZNF440	-1.23001	3.34042	0.00126826	0.0271785
NKX6-1	5.83935	2.05186	0.00126843	0.0271785
IL17RE	-1.82308	2.74836	0.00127359	0.02726
CDH3	-2.67407	2.68617	0.0012776	0.0273167
RBBP5	-1.05386	4.58091	0.00129845	0.0277329
MAPK10	-1.90685	3.19879	0.00131565	0.0280705
LYVE1	-2.13427	4.54143	0.00131751	0.0280803
KCTD9	-1.1696	4.75511	0.00132271	0.0281611
IGF2BP1	5.26953	4.26185	0.00135623	0.0288443
GGT6	-4.09286	0.359462	0.0013584	0.0288599
PRKCD	-1.32456	4.95496	0.00140165	0.0297472
HPGDS	-1.90007	2.31988	0.00142153	0.030134
LYZ	-2.04305	7.06604	0.00142318	0.030134
MECOM	-1.61656	4.44684	0.00142438	0.030134
C3orf55	-2.3009	0.22044	0.00142717	0.0301614
KNDC1	-2.6454	1.21571	0.00144672	0.0305424
PLA2G16	-2.0389	5.05767	0.00145037	0.0305872
FOXN1	-2.35593	-1.99794	0.00149929	0.0315858
FAM83B	-2.94399	0.369956	0.00150574	0.0316884
FOXA3	-2.69362	-0.801028	0.00152189	0.031988
VNN2	-2.01663	0.873141	0.00152316	0.031988
C4BPB	-2.63904	-0.870716	0.00153114	0.032122
CLLU1OS	-2.68987	-3.35513	0.00154549	0.032376
C10orf107	-2.41292	0.923233	0.00154713	0.032376
FREM1	-2.48699	1.8761	0.00154875	0.032376
LTBP2	-1.89747	7.17017	0.0015497	0.032376
LOC100129175	-3.27652	-3.46345	0.00155885	0.0325333
KRT8	-2.68954	4.31017	0.00156209	0.0325671
SAMD15	-1.77378	0.45447	0.00157592	0.0328214
MET	-1.57674	4.89919	0.00159004	0.033081
SCNN1B	-3.30492	2.32487	0.00161226	0.0335087
METTL7A	-1.91439	5.76985	0.00161876	0.0336088
STRBP	-1.47068	3.62953	0.00163096	0.0338272
SMIM14	-1.23221	4.43782	0.00163751	0.0339281
ANKDD1A	-1.24825	2.99753	0.00164127	0.033971
RBP4	-2.51622	6.0611	0.00166545	0.0344359
LOC100506810	-1.7116	-0.763951	0.00166784	0.0344499
LCNL1	-2.49341	0.90206	0.00167408	0.0345149
ADAM8	-1.66805	4.00223	0.00167443	0.0345149
GAGE2A	-4.57021	-0.68963	0.00170601	0.0351299
ABLIM1	-1.72561	6.09246	0.00171078	0.035192
CAMK1	-1.23364	4.46443	0.00176182	0.0362048
B4GALNT1	3.45737	4.86099	0.00176439	0.0362205
PLXNA4	-2.24414	3.70848	0.00177058	0.0363104
KEL	-1.80012	-1.31089	0.00177767	0.0364186
RNF19B	-1.08798	5.02442	0.00179172	0.0366691
GJC1	2.03409	5.22239	0.00180127	0.036827
ENPP1	-2.37221	7.49205	0.00181063	0.0369807
F2R	-1.57231	6.20676	0.00183625	0.0374658
LOC284837	-2.04204	0.436221	0.00186917	0.0380989
CLEC7A	-1.60566	3.68982	0.00187161	0.0381098
TMSB15A	5.5471	4.0716	0.00190359	0.0387217
MYCL1	-1.80036	2.15721	0.00192245	0.0390658
AP1M2	-2.87865	1.12654	0.00193145	0.039209
CPO	-2.29352	-1.70401	0.00194038	0.0393505
NPY1R	-2.70182	2.81565	0.00194489	0.0394022
HOTAIR	4.69854	1.978	0.00194763	0.039418
OVOL2	-3.58128	-0.790499	0.00195216	0.0394699
ADARB2	-2.7948	-1.39278	0.00195651	0.0395179
C10orf128	-1.83519	1.98273	0.00197018	0.039754
VSTM1	-2.43588	-2.96561	0.00197769	0.0398655
DKK4	-2.96603	-3.3699	0.0020259	0.0407964
CPA6	-2.5774	-0.978603	0.00203391	0.0409165
ARHGAP18	-1.27887	5.34364	0.00203913	0.0409806
DNAH2	-2.48444	2.60021	0.00204475	0.0410169
C10orf54	-1.37378	5.46283	0.00204502	0.0410169
PLEKHB1	-2.34117	2.29893	0.0020629	0.0413341
FA2H	-2.95448	-1.3139	0.00206555	0.041346
OR1E1	-3.18366	-3.306	0.00208463	0.0416865
KIAA1211L	-1.57022	3.44453	0.00209342	0.0418205
LOC100422737	-3.62584	-3.12884	0.00210061	0.0419188
TRPM1	-2.68381	-1.49175	0.00210252	0.0419188
ENTPD2	-2.4347	-0.370452	0.00214899	0.0428029
ACER2	-1.6457	0.766885	0.00216996	0.0431777
FGR	-1.68522	3.47335	0.00218165	0.043342
CCDC13	-2.12258	0.407293	0.00218254	0.043342
E2F1	2.42879	5.16505	0.00219477	0.0435125
DNMBP-AS1	-2.43054	-2.01786	0.00219545	0.0435125
RCBTB1	-1.04007	4.92841	0.00220631	0.0436845
TMEM154	-1.59479	1.90066	0.00222229	0.0439575
LOC100132832	-1.45947	-0.639465	0.00223237	0.0441135
AADACL2	-3.25382	-3.45469	0.00223566	0.0441345
RAD54L	2.42931	4.14876	0.00223783	0.0441345
SLC5A5	-2.12271	-0.702415	0.00224329	0.0441886
KIAA1407	-1.44056	2.97517	0.00224497	0.0441886
STS	-1.29527	4.35772	0.00225496	0.0443417
FPR3	-1.56915	4.98536	0.0022682	0.0445583
CYBRD1	-1.35611	7.63876	0.00227432	0.0446349
NLRP3	-1.66516	2.20622	0.00230502	0.0451932
HYDIN	-2.82913	1.92598	0.00232151	0.0454678
CXorf30	-3.13347	0.0799336	0.00232355	0.0454678
DLX1	3.5671	2.96864	0.0023374	0.0456606
LOC100288748	-2.66738	-1.91916	0.00233795	0.0456606
NQO1	-1.58974	5.06976	0.00238477	0.0465296
CDA	-1.74914	0.86809	0.00239141	0.046614
CD300LB	-1.78733	0.714502	0.00240005	0.046737
DOC2B	-2.22047	0.0704212	0.00242166	0.0471121
LOC100505633	-3.05034	0.674521	0.00242497	0.0471308
DCDC1	-2.51284	-2.65065	0.00243717	0.0473221
LYPD3	-1.78797	1.31011	0.00248501	0.0482044
RFX3	-1.3245	1.82455	0.0024971	0.0483676
TTC30A	-1.23025	2.99639	0.00249824	0.0483676
TGM5	-2.03584	-1.63927	0.00250658	0.0484822
RABL2A	-1.30817	2.45698	0.00250996	0.048501
PIK3IP1	-1.43016	4.84634	0.00252702	0.0487836
PKP3	-2.4035	1.94085	0.00253986	0.0489845
KLK13	-3.00951	-2.07533	0.00257068	0.0495313
RBP7	-1.8687	2.67707	0.00258128	0.0496878
